# Supplementary material
Source: publisher figshare collection journal article supplement (https://acs.figshare.com/ndownloader/files/3898978)
Supplement: Supplementary file 1 [file 3898978]

## Supporting Information

### **Biochar impacts soil bacterial community composition and nitrogen cycling in an acidic soil planted with rape**

Hui-Juan Xu,<sup>†,‡,#</sup> Xiao-Hui Wang,<sup>‡,§,#</sup> Hu Li,<sup>†,‡</sup> Huai-Ying Yao,<sup>†</sup> Jian-Qiang Su,<sup>†</sup> and Yong-Guan Zhu<sup>\*,†</sup>

<sup>†</sup>*Key Laboratory of Urban Environment and Health, Institute of Urban Environment, Chinese Academy of Sciences, Xiamen 361021, China*

<sup>‡</sup>*State Key Lab of Urban and Regional Ecology, Research Center for Eco-environmental Sciences, Chinese Academy of Sciences, Beijing 100085 China*

<sup>§</sup>*University of Chinese Academy of Sciences, Beijing 100049, China*

\* Corresponding author. Email: [ygzhu@iue.ac.cn](mailto:ygzhu@iue.ac.cn)

# These authors contributed equally to this work.

#### **Main content**

Supporting Methods

Supporting Sequencing Data

Table S1 to Table S6

Figure S1 to Figure S5

## 1    **Supporting Methods:**

2    **Preparation of rape seeding.** Picked full seeds were put in 70% alcohol for 30 s  
3    and sterilized in 3% (v/v) H<sub>2</sub>O<sub>2</sub> for 15 min followed by thorough washing with  
4    deionized water, before being germinated in a 37°C thermostat incubator. After 24  
5    hours, uniform seeding were selected and transplanted into pots.

6    **The closed chamber method to measure Nitrous oxide (N<sub>2</sub>O) fluxes.** The  
7    chamber was of the base-lid type, made of polycarbonate engineering plastic. The  
8    base was a cylindrical flux chamber of 30 cm in diameter and 90 cm in height. The  
9    chamber lid was also made of polycarbonate engineering plastic with the same  
10    diameter as the base. When the lid was closed, it compressed a rubber gasket  
11    cemented to its underside against a horizontal flange at the top of the base walls, thus  
12    providing a gas seal.

13    **Potential nitrification rate and denitrification enzyme activity.** Potential  
14    nitrification rate (PNR) was measured using a chlorate inhibition method <sup>1</sup>. Briefly,  
15    5.0 g of fresh soil was added to 50-ml centrifuge tubes containing 20 ml phosphate  
16    buffer solution (PBS) (g L<sup>-1</sup>: NaCl, 8.0; KCl, 0.2; Na<sub>2</sub>HPO<sub>4</sub>, 0.2; NaH<sub>2</sub>PO<sub>4</sub>, 0.2; pH  
17    7.4) with 1 mM (NH<sub>4</sub>)<sub>2</sub>SO<sub>4</sub>. Potassium chlorate with a final concentration of 10 mM  
18    was added to the tubes to inhibit nitrite oxidation. The suspension was incubated in a  
19    dark incubator at 25°C for 24 h, and nitrite was extracted with 5 ml of 2 M KCl and  
20    determined by a spectrophotometer at wavelength of 540 nm with N-(1-naphthyl)  
21    ethylenediamine dihydrochloride.

22 Denitrification enzyme activity was determined using the acetylene ( $C_2H_2$ ) inhibition  
23 technique <sup>2</sup>. Briefly, 10.0 g of fresh soil was added to 120-ml serum bottles  
24 containing 10 ml buffer solution (1 mM glucose and 1 mM  $KNO_3$ ). Flasks were then  
25 sealed and made anoxic by repeated evacuation and filling with He for three times.  
26 Then  $C_2H_2$  was injected to the headspace and over-pressure was released with a  
27 syringe (without piston) to make a final concentration of 10% v/v to inhibit  $N_2O$   
28 reduction. All bottles were transferred to the robotized incubation system<sup>3</sup> to monitor  
29  $N_2O$  for 5 h. The amount of  $N_2O$  in the headspace and DEA were calculated as  
30 indicated by Guo *et al.* <sup>2</sup>

31 **Determination of nitrate and ammonium in rape.** Rape nitrate and ammonium  
32 contents were determined by grinding extraction method: weighted 5 g fresh rape  
33 into a mortar, added 1.0 ml 30% trichloroacetic acid and 0.5 g Quartz sand, grinded  
34 until the sample was homogenized, transferred the homogenate with 29 ml deionized  
35 water to a 50 ml centrifugal tube, and centrifugated for 10 min at a speed of  $3000 \times g$ .  
36 Then 2 ml supernatant was diluted to 100 ml and determined by a Continuous Flow  
37 Analyser (SAN++, Skalar, Breda, Holland).

38 **Rape nitrite determination.** The extraction procedure was described as follows:  
39 fresh rape was washed with deionized water, air dried, cut into very small pieces,  
40 homogenized with some water (recorded the volume used); 5.00 g homogenate was  
41 weighted, washed into a 100 ml flask with 80 ml deionized water, ultrasonic  
42 extracted for 30 min (gently shaking the flasks every 5 min to disperse the solid  
43 phase), put into 75°C water bath for 5 min; the extraction were took out of the water

44 bath, cooled to room temperature, diluted to 100 ml, filtered, and centrifuged for  
45 15 min at  $8000 \times g$ . The supernatant was determined by spectrophotometry.

46 **RNA extraction procedure.** Briefly, 0.5 g of fresh soil were extracted with 0.5 ml of  
47  $K_3PO_4$  extraction buffer (240 mM, pH 8.0) and 0.5 ml of  
48 phenol-chloroform-isoamylalcohol (25:24:1) (pH > 7.8). Samples were lysed for 45  
49 s at the FastPrep-24 speed setting of 5.5 m/s, and the aqueous phase containing  
50 nucleic acids was separated by centrifugation at  $16,000 \times g$  for 5 min at  $4^\circ C$ . The  
51 aqueous layer was removed and mixed with an equal volume of chloroform-isoamyl  
52 alcohol (24:1). After centrifugation, 2 volumes of 30% (w/v) polyethylene glycol  
53 (PEG) 6000 precipitate solution was added to the aqueous phase, incubated at room  
54 temperature for 2 h, and then centrifuged for 10 min at  $4^\circ C$ . The nucleic acids are  
55 pelleted by centrifugation at  $18,000 \times g$  at  $4^\circ C$  for 10 min and then washed with ice  
56 cold 70% ethanol, air-dried, and resuspended in 50  $\mu l$  of TE (pH 7.4).

57 **The establishment of standard curves for quantitative PCR.** The standard curves  
58 for quantitative PCR were established using archaeal and bacterial 16S rRNA,  
59 archaeal and bacterial *amoA*, *nirK*, *nirS* and *nosZ* gene fragments cloned into  
60 plasmid pGEM-T Easy Vector (3015 bp, Promega, Madison, USA). These gene  
61 fragments were amplified with the primers in Table S3, respectively. The amplicons  
62 were gel-purified using the Gel Clean-up System (Promega, Madison, USA) and  
63 cloned using the pGEM-T Easy cloning kit according to the manufacturer's  
64 instructions. Plasmids were transformed into *Escherichia coli* JM109 competent  
65 cells. Plasmid DNA was extracted using a Qiagen Plasmid Mini Kit (Qiagen Nordic)

66 and plasmid concentration was determined using a NanoDrop ND-1000  
67 spectrophotometer. Plasmid DNA was diluted in ten-fold series to generate standard  
68 curves.

69 **Cammands used in High-throughput sequencing data preprocessing.**

70 1) pick\_otus\_through\_otu\_table.py -i /home/qiime/Desktop/Data/biochar.fna -o  
71 /home/qiime/Desktop/Data/ucr/ -p /home/qiime/Desktop/Data/ucrC\_params.txt  
72 2) parallel\_identify\_chimeric\_seqs.py -i /home/qiime/Desktop/Data/ucr/  
73 pynast\_aligned\_seqs/biochar\_rep\_set\_aligned.fasta -a  
74 /home/qiime/qiime\_software/core\_set\_aligned.fasta.imputed -o  
75 /home/qiime/Desktop/Data/ucr/chimeric\_seqs.txt  
76 3) filter\_fasta.py -f ucr/pynast\_aligned\_seqs/biochar\_rep\_set\_aligned.fasta -o  
77 ucr/pynast\_aligned\_seqs/non\_chimeric\_seqs\_rep\_set\_aligned.fasta -s  
78 /home/qiime/Desktop/Data/ucr/chimeric\_seqs.txt -n  
79 4) make\_otu\_table.py -i ucr/uclust\_ref\_picked\_otus/biochar\_otus.txt -o  
80 ucr/non\_chimeric\_otu\_table.biom -t ucr/rdp\_assigned\_taxonomy/  
81 biochar\_rep\_set\_tax\_assignments.txt -e /home/qiime/Desktop/Data/ucr/  
82 chimeric\_seqs.txt -e ucr/pynast\_aligned\_seqs/biochar\_rep\_set\_failures.fasta  
83 5) filter\_otus\_from\_otu\_table.py -i /home/qiime/Desktop/Data  
84 /ucr/non\_chimeric\_otu\_table.biom -o /home/qiime/Desktop/Data  
85 /ucr/non\_chimeric\_otu\_table\_no\_singletons.biom -n 2  
86 6) convert\_biom.py -i /home/qiime/Desktop/Data/  
87 ucr/non\_chimeric\_otu\_table\_no\_singletons.biom -o /home/qiime/Desktop/Data/

```

88     ucr/non_chimeric_otu_table_no_singletons.txt -b --header_key taxonomy
89 7) filter_alignment.py -i ucr/pynast_aligned_seqs
90    /non_chimeric_seqs_rep_set_aligned.fasta -m
91    /home/qiime/Desktop/Data/lanemask_in_1s_and_0s -o ucr/pynast_aligned_seqs
92 8) make_phylogeny.py -i
93    ucr/pynast_aligned_seqs/non_chimeric_seqs_rep_set_aligned_pfiltered.fasta -o
94    ucr/non_chimeric_rep_set.tre
95 9) make_otu_heatmap_html.py -i ucr/non_chimeric_otu_table_no_singletons.biom
96    -o ucr/OTU_Heatmap/
97 10) make_otu_network.py -m /home/qiime/Desktop/Data/ map_biochar.txt -i
98    ucr/non_chimeric_otu_table_no_singletons.biom -o ucr/OTU_Network
99 11) summarize_taxa_through_plots.py -i
100    ucr/non_chimeric_otu_table_no_singletons.biom -o taxa_summary -m
101    map_biochar.txt
102 12) per_library_stats.py -i ucr/non_chimeric_otu_table_no_singletons.biom
103 13) echo "alpha_diversity:metrics
104    shannon,PD_whole_tree,chao1,observed_species,simpson_reciprocal,simpson,si
105    mpson_e" > alpha_params.txt
106 14) alpha_rarefaction.py -i ucr/non_chimeric_otu_table_no_singletons.biom -m
107    map_biochar.txt -o arare -p alpha_params.txt -t ucr/non_chimeric_rep_set.tre -a
108 15) alpha_rarefaction.py -i ucr/non_chimeric_otu_table_no_singletons.biom -m
109    map_biochar.txt -o arare_19772-p alpha_params.txt -t

```

```
110      ucr/non_chimeric_rep_set.tre -e 19772 -a
111  16) echo "beta_diversity:metrics " > beta_params.txt
112  17) beta_diversity_through_plots.py -i
113      ucr/non_chimeric_otu_table_no_singletons.biom -m map_biochar.txt -o
114      bdiv_even_19772/ -t ucr/non_chimeric_rep_set.tre -e 19772-a
```

115

## 116 **Supporting Sequencing Data:**

117 After demultiplexing and quality filtering, 723 854 high-quality sequences were  
118 obtained in total, with an average number of sequences per sample of  $45\,241 \pm 2\,704$   
119 (standard error), ranging from 30 677 to 67 588 sequences in each sample. These  
120 sequences were clustered into 40 120 OTUs. Of these OTUs, 59.6% were singletons,  
121 accounting for 3.3% of total sequences. High percentages of singletons of classified  
122 OTUs are common in metagenomic studies using Illumina sequencing technique.<sup>4,5</sup>  
123 Since the percentage of singleton sequences of the total sequences is low, the  
124 sequencing result was reliable. After removing chimeras and singletons, 15 908  
125 OTUs were reserved, with an average of 4685 OTUs per sample. The sequences of  
126 chimeras in each sample except sample BP1 varied from 4 to 321. After removing  
127 chimeras and singletons, at least 19 772 sequences were obtained for each sample.

128

Table S1 Basic properties of the soil and biochar used in biochar amendment pot trial study in greenhouse

|                      | pH    | EC   | Total N<br>(g kg <sup>-1</sup> ) | Total C<br>(g kg <sup>-1</sup> ) | C/N  | Available P<br>(mg kg <sup>-1</sup> ) | Available K<br>(mg kg <sup>-1</sup> ) | Soil texture (%) |       |       | Ash content<br>(%) | BET (N <sub>2</sub> ) <sup>b</sup><br>surface area<br>(m <sup>2</sup> /g) |
|----------------------|-------|------|----------------------------------|----------------------------------|------|---------------------------------------|---------------------------------------|------------------|-------|-------|--------------------|---------------------------------------------------------------------------|
|                      |       |      |                                  |                                  |      |                                       |                                       | Sand             | Silt  | Clay  |                    |                                                                           |
| soil                 | 4.48  | 1.38 | 2.4                              | 15.4                             | 6.5  | 118.7                                 | 322.1                                 | 10.28            | 78.73 | 10.99 | -                  | -                                                                         |
| Biochar <sup>a</sup> | 10.30 | 5.46 | 17.8                             | 486                              | 27.3 | -                                     | -                                     | -                | -     | -     | 29.30              | 11.97                                                                     |

129 Note: <sup>a</sup> Rice straw biochar. <sup>b</sup> Measured by an ASAP 2020 surface area and porosity analyzer (Micromeritics, USA).

130

131

Table S2 Elemental composition<sup>a</sup> of the soil and biochar used in biochar amendment pot trial study in greenhouse

| Element (%)          | Si    | K     | Cl    | Ca   | Mg   | P    | Fe   | S     | Mn    | Na   | Al   | Zn    | Rb    | Ba    | Ti    | Cr    | Sr    |
|----------------------|-------|-------|-------|------|------|------|------|-------|-------|------|------|-------|-------|-------|-------|-------|-------|
| Soil                 | 13.62 | 10.00 | 2.60  | 1.74 | 0.97 | 0.93 | 0.48 | 0.43  | 0.34  | 0.32 | 0.23 | 0.067 | 0.030 | 0.024 | 0.023 | 0.015 | 0.008 |
| Biochar <sup>b</sup> | 29.39 | 2.13  | 0.019 | 0.83 | 1.11 | 0.26 | 4.36 | 0.098 | 0.059 | 0.59 | 8.27 | 0.012 | 0.012 | 0.059 | 0.533 | 0.010 | 0.012 |

132 Note: <sup>a</sup> Determined by X-ray fluorescence spectroscopy with a Panalytical spectrometer (PANalytical B.V., ALMELO, the Neterlands).

133

<sup>b</sup> Rice straw biochar



134

Table S3 Primers and PCR conditions used for the real-time PCR in biochar amendment pot trial study

| Target group              | Primer              | Sequence (5'→3') <sup>b</sup> | Thermal profile for real-time PCR                                        | Reference |
|---------------------------|---------------------|-------------------------------|--------------------------------------------------------------------------|-----------|
| Archaeal 16S <i>rRNA</i>  | A364aF              | CGGGGYGCASCAGGCGCGAA          | 2 min at 94°C , followed by 40 cycles of 20 s at                         | 3         |
|                           | Ar958R              | YCCGGCGTTGAVTCCAATT           | 94°C , 30 s at 63°C , and 32 s at 72°C .                                 | 7         |
| bacterial 16S <i>rRNA</i> | 1369F               | CGGTGAATACGTTTCYCGG           | 2 min at 95°C, followed by 40 cycles of 15 s at 95°C, and 1 min at 60°C. | 8         |
|                           | 1492R               | GGWTACCTTGTTACGACTT           |                                                                          |           |
|                           | Probe TM1389F       | CTTGTAACACACCGCCCGTC          |                                                                          |           |
| AOA <sup>a</sup>          | Arch- <i>amoA</i> F | STAATGGTCTGGCTTAGACG          | 2 min at 95°C , followed by 40 cycles of 30 s at                         | 9         |
|                           | Arch- <i>amoA</i> R | GCGGCCATCCATCTGTATGT          | 95°C , 30 s at 58°C , and 45 s at 72°C .                                 |           |
| AOB <sup>a</sup>          | <i>amoA</i> -1F     | GGGGTTTCTACTGGTGGT            | 2 min at 95°C, followed by 40 cycles of 30 s at                          | 10        |
|                           | <i>amoA</i> -2R     | CCCCTCKGSAAAGCCTTCTTC         | 95°C , 30 s at 60°C, and 32 s at 72°C.                                   |           |
| <i>nirK</i>               | <i>nirK</i> -1F     | GGMATGGTKCCSTGGCA             | 5 min at 95°C, followed by 40 cycles of 30 s at                          | 11        |
|                           | <i>nirK</i> -5R     | GCCTCGATCAGRTTGTGGTT          | 95°C, 40 s at 58 °C, and 40 s at 72°C.                                   |           |
| <i>nirS</i>               | cd3aF               | GTSAACGTSAAGGARACSGG          | 2 min at 95°C, followed by 40 cycles of 5 s at                           | 12        |
|                           | R3cd                | GASTTCGGRTGSGTCTTGA           | 95°C , 40 s at 62°C, and 35 s at 72°C.                                   |           |
| <i>nosZ</i>               | <i>nosZ</i> -F      | CGYTGTTCMTCGACAGCCAG          | 1 min at 95°C, followed by 40 cycles of 15 s at                          | 13        |
|                           | <i>nosZ</i> -R      | CGSACCTTSTTGCCSTYGCG          | 95°C , 15 s at 62°C, and 31 s at 72°C.                                   |           |

135 **Note:** a. AOA-ammonia-oxidizing archaea; AOB-ammonia-oxidizing bacteria. b. Y = C or T; M = A or C; W = A or T; R = A or G; K = G or T; S = C or G.

136

137 Table S4 Comparison of  $\alpha$ -diversity indices in four treatments with or without  
 138 biochar amendment

| Indices<br>Treatments | chao1      | observed<br>species | PD_whole<br>tree | Shannon    | Simpson        |
|-----------------------|------------|---------------------|------------------|------------|----------------|
| C                     | 6337±359b  | 2659±178c           | 130.2±5.3c       | 8.37±0.21c | 0.9862±0.0042b |
| CP                    | 6971±554ab | 2947±208bc          | 144.9±7.4b       | 8.64±0.16b | 0.9896±0.0009b |
| B                     | 6878±961ab | 3205±309ab          | 145.6±10.9b      | 9.25±0.13a | 0.9937±0.0006a |
| BP                    | 7694±840a  | 3507±240a           | 160.2±8.7a       | 9.39±0.16a | 0.9940±0.0008a |

139 Control: without biochar amendment; RC: with biochar amendment;

140 -P: without rape planting; +P: with rape planting.

141

Table S5 Correlations<sup>a</sup> of soil properties

|                              |   | pH             | moisture       | TN             | TC             | C/N            | NO <sub>3</sub> <sup>-</sup> | NH <sub>4</sub> <sup>+</sup> | CEC |
|------------------------------|---|----------------|----------------|----------------|----------------|----------------|------------------------------|------------------------------|-----|
| pH                           | r | 1              | -              | -              | -              | -              | -                            | -                            | -   |
| moisture                     | r | -0.188         | 1              | -              | -              | -              | -                            | -                            | -   |
| TN                           | r | <b>0.909**</b> | 0.180          | 1              | -              | -              | -                            | -                            | -   |
| TC                           | r | <b>0.988**</b> | -0.090         | <b>0.956**</b> | 1              | -              | -                            | -                            | -   |
| C/N                          | r | <b>0.998**</b> | -0.214         | <b>0.905**</b> | <b>0.990**</b> | 1              | -                            | -                            | -   |
| NO <sub>3</sub> <sup>-</sup> | r | -0.148         | <b>0.913**</b> | 0.193          | -0.060         | -0.173         | 1                            | -                            | -   |
| NH <sub>4</sub> <sup>+</sup> | r | -0.513         | -0.117         | -0.533         | -0.530         | -0.496         | -0.037                       | 1                            | -   |
| CEC                          | r | <b>0.891**</b> | 0.209          | <b>0.938**</b> | <b>0.910**</b> | <b>0.876**</b> | 0.262                        | -0.538                       | 1   |

142 a: Pearson correlation coefficients were used to the correlation analysis. Difference were considered significant at a P value of  $\leq 0.01$ (\*\*).

143  
144  
145

Table S6 Correlations<sup>a</sup> of abundant phyla with soil properties

|                                 |   | Proteobacteria  | Firmicutes      | Acidobacteria   | Chloroflexi     | Actinobacteria | Gemmatimonadetes | Bacteroidetes  | TM7            | Cyanobacteria |
|---------------------------------|---|-----------------|-----------------|-----------------|-----------------|----------------|------------------|----------------|----------------|---------------|
| pH                              | r | -0.073          | 0.480           | <b>-0.947**</b> | <b>-0.710**</b> | 0.293          | <b>0.958**</b>   | <b>0.973**</b> | <b>0.799**</b> | -0.311        |
| moisture                        | r | -0.526          | 0.331           | 0.226           | 0.027           | -0.351         | -0.279           | -0.204         | -0.264         | 0.360         |
| TN                              | r | -0.329          | <b>0.658**</b>  | <b>-0.840**</b> | <b>-0.733**</b> | 0.104          | <b>0.796**</b>   | 0.906          | <b>0.755**</b> | -0.152        |
| OC                              | r | -0.162          | 0.564           | <b>-0.931**</b> | <b>-0.738**</b> | 0.230          | <b>0.912**</b>   | <b>0.973**</b> | <b>0.825**</b> | -0.271        |
| C/N                             | r | -0.063          | 0.485           | <b>-0.949**</b> | <b>-0.718**</b> | 0.291          | <b>0.946**</b>   | <b>0.974**</b> | <b>0.826**</b> | -0.308        |
| NO <sub>3</sub> <sup>-</sup> -N | r | <b>-0.638**</b> | 0.261           | 0.117           | -0.021          | -0.062         | -0.204           | -0.152         | -0.263         | 0.503         |
| NH <sub>4</sub> <sup>+</sup> -N | r | 0.440           | <b>-0.661**</b> | 0.426           | 0.145           | 0.105          | -0.460           | -0.503         | -0.248         | 0.514         |
| CEC                             | r | -0.235          | 0.495           | <b>-0.817**</b> | <b>-0.662**</b> | 0.204          | <b>0.830**</b>   | <b>0.851**</b> | 0.601          | -0.101        |

146

a: Pearson correlation coefficients were used to the correlation analysis. Difference were considered significant at a P value of  $\leq 0.01$ (\*\*).

147

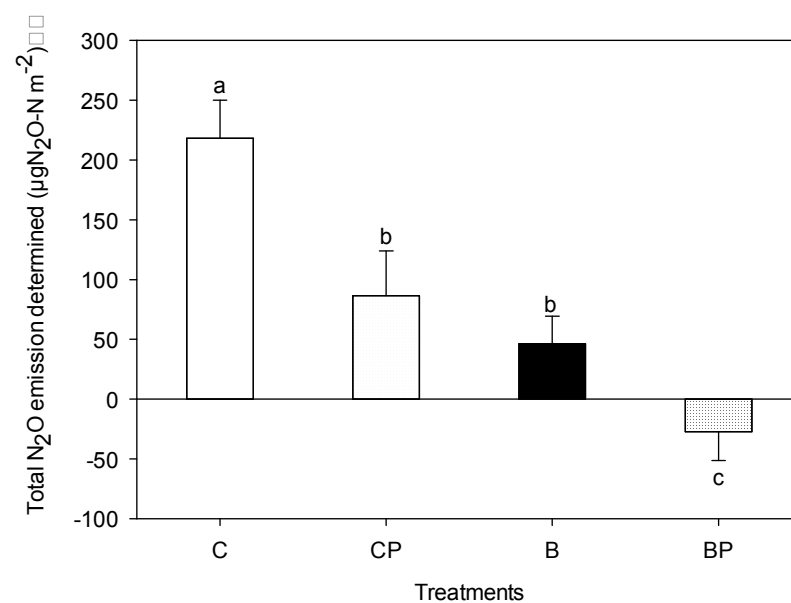

148

149 Figure S1 N<sub>2</sub>O accumulation during determination period. The accumulation of N<sub>2</sub>O  
150 is calculated by adding N<sub>2</sub>O emission in 2 hours determined each week. The letters  
151 were used to show the differences among treatments.

152

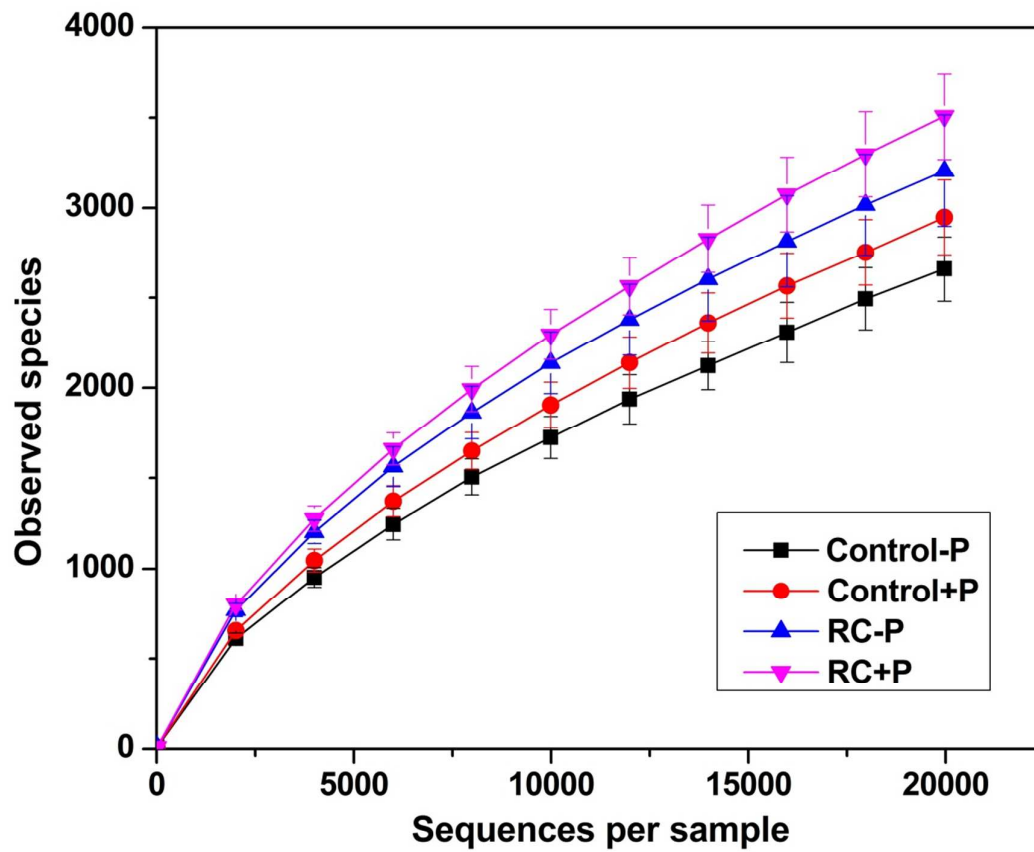

153

154 Figure S2 Rarefaction of observed species at a sequencing depth of 19 772

155 sequences per sample

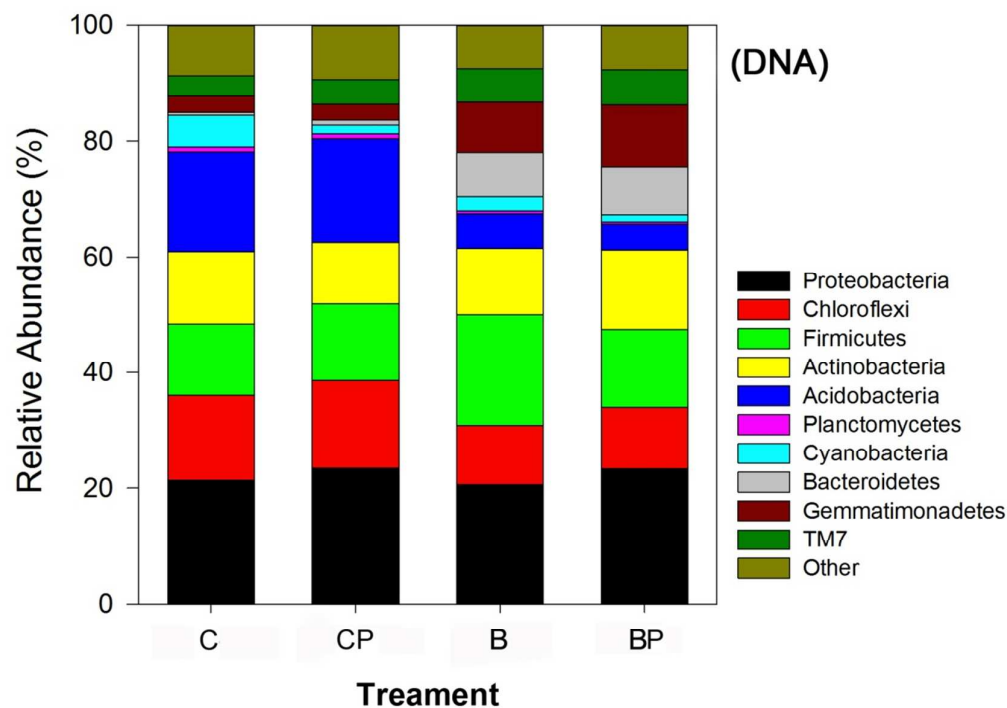

156

157 Figure S3 Relative abundances of bacterial community composition at phylum level  
 158 detected in biochar treated and untreated soils. The abundance is presented in terms  
 159 of an average percentage of four replicates, classified by RDP Classifier at a  
 160 confidence threshold of 97%. “Other” refers to the sum of unclassified sequences  
 161 and all other taxa with abundances lower than 0.9% in any sample. C: biochar  
 162 untreated soil without rape, CP: biochar untreated soil with rape, B: biochar treated  
 163 soil without rape, BP: biochar treated soil with rape.

164

165

166

167

168

169

170

171

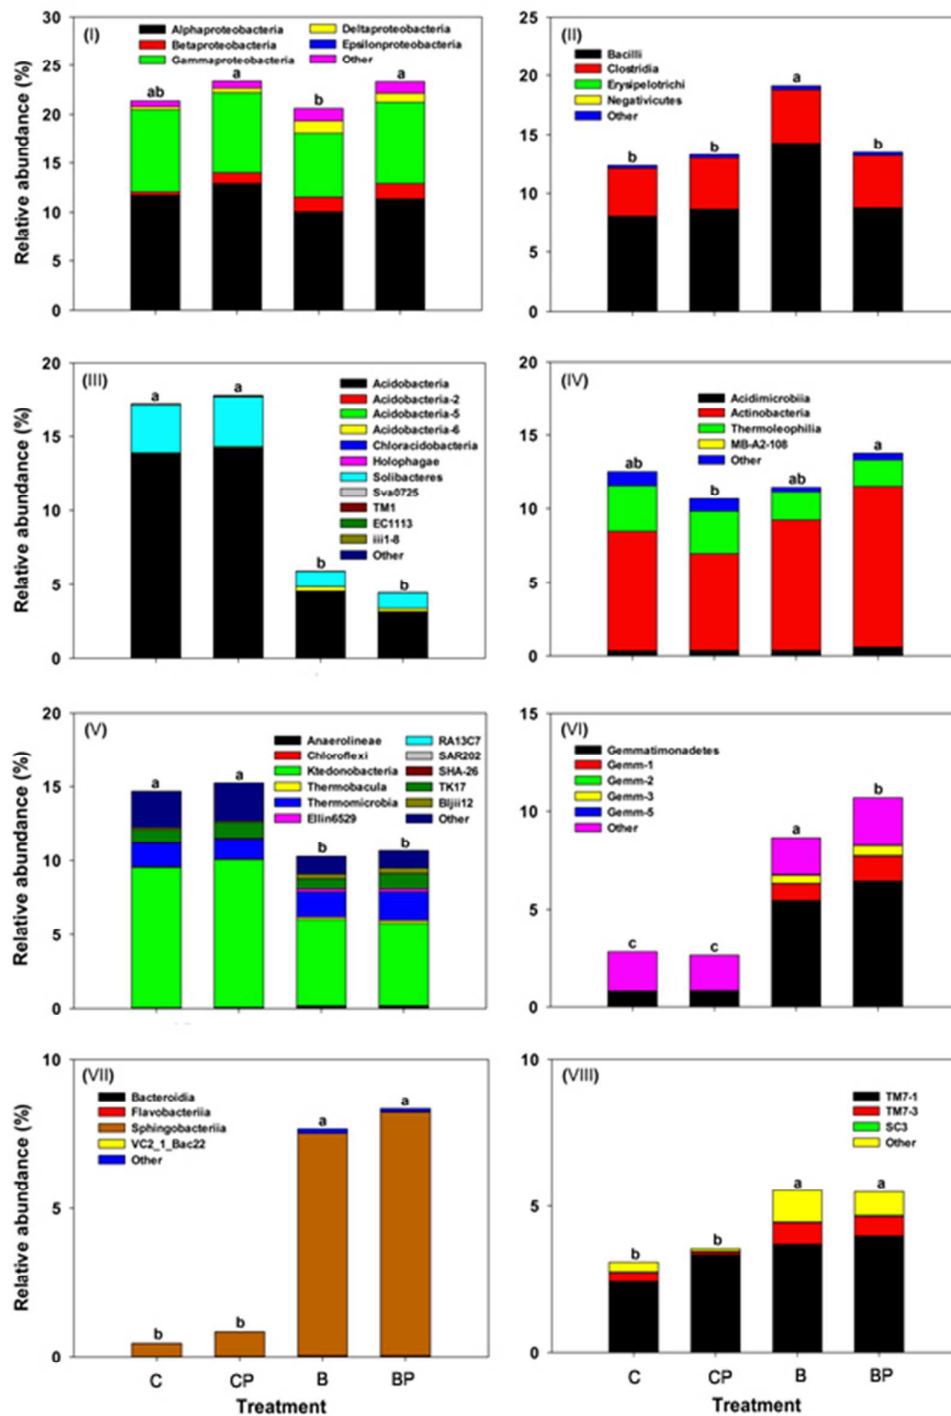

172  
 173 **Figure S4** Relative abundances of taxa at class level in the eight dominant phyla  
 174 detected in biochar treated and untreated soils (I: Proteobacteria, II: Firmicutes, III:  
 175 Acidobacteria, IV: Actinobacteria, V: Chloroflexi, VI: Gemmatimonadetes, VII:



176 Bacteroidetes, VIII: TM7). The abundance is presented in terms of an average  
 177 percentage of four replicates, classified by RDP Classifier at a confidence threshold  
 178 of 97%. “Other” refers to the sum of unclassified sequences and all other taxa  
 179 unnamed. C: biochar untreated soil without rape, CP: biochar untreated soil with  
 180 rape, B: biochar treated soil without rape, BP: biochar treated soil with rape. The  
 181 letters were used to show the differences among treatments at phylum level.

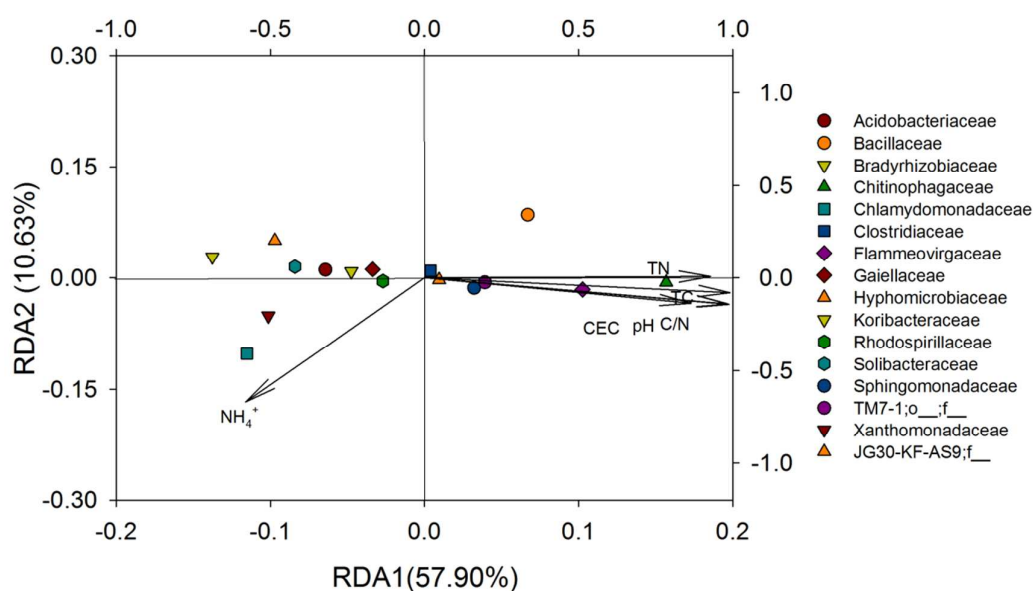

182  
 183 **Figure S5** Redundancy analysis (RDA) of bacterial community composition  
 184 obtained using the family abundances matrix in each sample. The symbols represent  
 185 different taxa in family level.

## 186 Supplementary references

- 187 (1) He, J. Z.; Shen, J. P.; Zhang, L. M.; Zhu, Y. G.; Zheng, Y. M.; Xu, M. G.; Di, H. Quantitative  
 188 analyses of the abundance and composition of ammonia-oxidizing bacteria and ammonia-oxidizing  
 189 archaea of a Chinese upland red soil under long-term fertilization practices. *Environ.Microbiol.* **2007**,  
 190 9 (9), 2364-2374.  
 191 (2) Guo, G. X.; Deng, H.; Qiao, M.; Mu, Y. J.; Zhu, Y. G. Effect of pyrene on denitrification activity  
 192 and abundance and composition of denitrifying community in an agricultural soil. *Environ. Pollut.*  
 193 **2011**, 159 (7), 1886-1895.  
 194 (3) Molstad, L.; Dorsch, P.; Bakken, L. R., Robotized incubation system for monitoring gases ( $\text{O}_2$ ,

195 NO, N<sub>2</sub>O, N<sub>2</sub>) in denitrifying cultures. *J. Microbiol. Methods* **2007**, 71 (3), 202-211.

196 (4) Lee-Cruz, L.; Edwards, D. P.; Tripathi, B. M.; Adams, J. M., Impact of Logging and Forest  
197 Conversion to Oil Palm Plantations on Soil Bacterial Communities in Borneo. *Applied and*  
198 *Environmental Microbiology* **2013**, 79, (23), 7290-7297.

199 (5) Caporaso, J. G.; Lauber, C. L.; Walters, W. A.; Berg-Lyons, D.; Lozupone, C. A.; Turnbaugh, P.  
200 J.; Fierer, N.; Knight, R., Global patterns of 16S rRNA diversity at a depth of millions of sequences  
201 per sample. *Proceedings of the National Academy of Sciences of the United States of America* **2011**,  
202 108, 4516-4522.

203 (6) Kemnitz, D.; Kolb, S.; Conrad, R., Phenotypic characterization of Rice Cluster III archaea  
204 without prior isolation by applying quantitative polymerase chain reaction to an enrichment culture.  
205 *Environ. Microbiol.* **2005**, 7 (4), 553-565.

206 (7) Delong, E. F., ARCHAEA IN COASTAL MARINE ENVIRONMENTS. *Proc. Natl. Acad. Sci.*  
207 *U.S.A.* **1992**, 89 (12), 5685-5689.

208 (8) Suzuki, M. T.; Taylor, L. T.; DeLong, E. F., Quantitative analysis of small-subunit rRNA genes  
209 in mixed microbial populations via 5'-nuclease assays. *Appl. Environ. Microbiol.* **2000**, 66 (11),  
210 4605-4614.

211 (9) Francis, C. A.; Roberts, K. J.; Beman, J. M.; Santoro, A. E.; Oakley, B. B., Ubiquity and  
212 diversity of ammonia-oxidizing archaea in water columns and sediments of the ocean. *Proc. Natl.*  
213 *Acad. Sci. U.S.A.* **2005**, 102 (41), 14683-14688.

214 (10) Rothauwe, J. H.; Witzel, K. P.; Liesack, W., The ammonia monooxygenase structural gene  
215 amoA as a functional marker: Molecular fine-scale analysis of natural ammonia-oxidizing populations.  
216 *Appl. Environ. Microbiol.* **1997**, 63 (12), 4704-4712.

217 (11) Braker, G.; Fesefeldt, A.; Witzel, K. P., Development of PCR primer systems for  
218 amplification of nitrite reductase genes (nirK and nirS) to detect denitrifying bacteria in  
219 environmental samples. *Appl. Environ. Microbiol.* **1998**, 64 (10), 3769-3775.

220 (12) Throback, I. N.; Enwall, K.; Jarvis, A.; Hallin, S., Reassessing PCR primers targeting nirS,  
221 nirK and nosZ genes for community surveys of denitrifying bacteria with DGGE. *FEMS*  
222 *Microbiol.Ecol.* **2004**, 49 (3), 401-417.

223 (13) Kloos, K.; Mergel, A.; Rosch, C.; Bothe, H., Denitrification within the genus *Azospirillum*  
224 and other associative bacteria. *Aust. J. Plant Physiol.* **2001**, 28 (9), 991-998.
